# Supplementary material for: Identifying the ideal thermodynamics of non-stoichiometric oxygen-carrier materials for chemical looping water-gas shift
Source: Royal Society of Chemistry journal article supplement (doi:10.1039/d4re00454j), 2025-01-01
Supplement: d4re00454j1.pdf [file d4re00454j1.pdf]

## 1 Matlab code for CLWGS reactor model

2 The function "ReactorModel.m" outputs a .mat file containing the gas concentrations and  
3 corresponding time resolution, cycle numbers and  $\delta$  values.

4 "ReactorModel.m"  
5 Initialise code and set thermodynamic properties

```
6 function ReactorModel
7 %WGS thermodynamic constants under isothermal conditions
8 T = 1093.15; % Reactor temperature (K)
9 R = 8.314; % Universal gas constant (J/molK)
10 Kox = 1.19323807516078E-09; %Equilibrium constant for oxidation half cycle at 1093
11 K, H2O = H2 + 1/2 O2
12 Kred = 1/1.19323807516078E-09; %Equilibrium constant for reduction half cycle at 1093
13 K, CO + 1/2 O2 = CO2
14
15 % Kox= 7.65449604394292E-08; %Equilibrium constant for oxidation half cycle at 1293K
16 % Kred= 7542158.25100165; %Equilibrium constant for reduction half cycle at 1293K
17
18 % Kox= 1.09706E-08; %Equilibrium constant for oxidation half cycle at 1193K
19 % Kred= 67788067.7; %Equilibrium constant for reduction half cycle at 1193K
20
21 % Kox= 7.08688E-11; %Equilibrium constant for oxidation half cycle at 993K
22 % Kred= 20892750937; %Equilibrium constant for reduction half cycle at 993K
23
24 % Kox=2.47252294976646E-12; %Equilibrium constant for oxidation half cycle at 893K
25 % Kred=967456158223.589; %Equilibrium constant for reduction half cycle at 893K
26 %Cycle settings
27
28 Trun = 60; % Length of half cycle in seconds
29 Number_of_cycles =25; % Number of redox cycles
30 %OCM  $\delta$ -pO2 relationship
31
32 dmax=1; % Maximum degree of non-stoichiometry
33 Midpoint=-17.8465457942801; % Log to the base ten of the midpoint of the logistic fit for the
34  $\delta$ -pO2 relationship
35 Kgrad = -1.151292546497; % Steepness of logistic function
```

37 OCM particle properties

```
38 rhoOCM=23071.57976; % Skeletal density of OCM at room temperature (mol/m3)
39 porosity=0; % Particle porosity, set to zero assuming unhindered gas flow through the bed
40 %Bed properties
41
42 L = 0.08; % Length of bed (m)
43 dl=L/100; % Discretised length
44 l=0:dl:L; % Create uniform mesh, row vector
45 numInc=length(l)-1; % Number of individual increments used in simulation
46 r = 0.002; % Bed radius (m)
47 A = pi()*r^2; % Bed cross section (m2)
48 epsilon =0.8; % Voidage of bed
49 rhogas=1e5/R/T; % Gas phase density (mol/m3)
50 flowrate_ox=50/1000/24/60; % Total gas flow during oxidation half cycle (mol/s)
51 flowrate_red=50/1000/24/60; % Total gas flow during reduction half cycle (mol/s)
52 Vg=dl*A*epsilon*rhogas; % Moles total gas in one increment
53 ms= rhoOCM*(1-porosity)*(1-epsilon)*A*dl; % Moles of OCM per control volume
54 molsOCM=L*A*(1-epsilon)*rhoOCM*(1-porosity); % Total moles of OCM in bed
```

56 Inlet gas concentrations as mole fractions and oxygen partial pressure

```

57 y_total=0.05; % Total concentrations of CO,CO2,H2,H2O must sum to 0.05 in argon
58 y_CO_inlet=0.04999999999; % CO inlet
59 y_H2O_inlet=0.04999999999; % H2O inlet
60 y_CO2_inlet=(y_total-y_CO_inlet); % CO2 inlet
61 y_H2_inlet=(y_total-y_H2O_inlet);% H2 inlet
62
63 p_ox = Kox^2*((y_H2O_inlet-y_H2_inlet)/y_H2_inlet)^2; % pO2 of inlet stream during
64 oxidation
65 p_red=(1/Kred)^2*(y_CO2_inlet/y_CO_inlet)^2; % pO2 of inlet stream during
66 reduction
67
68 delta_ox = dmax./(1+exp(-Kgrad.*(log10(p_ox)-Midpoint))); % δ value of inlet stream during
69 oxidation
70 delta_red = dmax./(1+exp(-Kgrad.*(log10(p_red)-Midpoint))); % δ value of inlet stream during
71 reduction
72

```

73 Calculating the value of  $\lambda_0$  for the simulation

```

74 lambda_0 = ((delta_red-delta_ox)*molsOCM)/(flowrate_ox*Trun*0.04999999999); % Value of λ0.
75 Insert a breakpoint here to confirm value when running simulation
76

```

77 Initialise parameters for ODE

```

78 IC=y_CO_inlet/(1+Kred*p_ox^0.5)*ones(numInc,1); % Initial condition for reduction half cycle
79
80 t=linspace(0,Trun,6000); % Set resolution for time
81
82 pCO=zeros(numInc,length(t),Number_of_cycles); % Predefine matrix sizes to speed up
83 calculations
84 pH2O=zeros(numInc,length(t),Number_of_cycles);
85 pO2=p_ox*ones(numInc,1);
86
87 J_red = spdiags([ones(numInc,1),ones(numInc,1)],[-1,0],numInc,numInc); % Set up jacobian
88 patterns
89 red_options=odeset('RelTol',1e-13,'AbsTol',1e-14,'Stats','off','JPattern',J_red);
90
91 J_ox = spdiags([ones(numInc,1),ones(numInc,1)], [0,1],numInc,numInc);
92 ox_options=odeset('RelTol',1e-13,'AbsTol',1e-14,'Stats','off','JPattern',J_ox);
93

```

94 ODE solving for each cycle

```

95 for cycle=1:Number_of_cycles
96
97     sol_red = ode45(@red_ode,[0,Trun],IC,red_options); % Use ode15s if stiff
98     pCO(:, :, cycle)=deval(sol_red,t); %Storing values of CO concentration from half cycle
99     P_eq=(1/Kred)^2*((y_total-pCO(:,end,cycle))./pCO(:,end,cycle)).^2; %pO2 at each point in
100 the bed at end of half cycle
101     IC=y_total./(1+Kox./P_eq.^0.5); %Initial condition for oxidation half cycle
102
103     sol_ox=ode45(@ox_ode,[0,Trun],IC,ox_options); % Use ode15s if stiff
104     pH2O(:, :, cycle)=deval(sol_ox,t); %Storing values of CO concentration from half cycle
105     P_eq=(Kox)^2*(pH2O(:,end,cycle)./(y_total-pH2O(:,end,cycle))).^2; %pO2 at each point in
106 the bed at end of half cycle
107     IC=y_total./(1+Kred*P_eq.^0.5); %Initial condition for reduction half cycle
108
109 end
110 %REDUCTION HALF CYCLE
111
112 function dydt=red_ode(t,u) %u represents the concentration of CO
113 pO2=(1/Kred)^2*((y_total-u)./u).^2;

```

```

114 dddp=(dmax*Kgrad.*exp(Kgrad*(log10(pO2)-Midpoint)))/(pO2*log(10).*(exp(Kgrad*(log10(pO2)-
115 Midpoint))+1).^2); %Derivative of logistic function
116 dpdy=(-2*(1/Kred)^2*y_total*(y_total-u))/(u.^3); % Finding dpO2/dyCO
117
118 % Setting up continuity equations
119 dydt=zeros(numInc,1);
120 dydt(1)=flowrate_red.*(u(1)-y_CO_inlet)/(-dpdy(1).*dddp(1).*ms-Vg); % Material balance for
121 increment 1
122 for j=2:numInc
123     dydt(j)=flowrate_red.*(u(j)-u(j-1))/(-dpdy(j).*dddp(j).*ms-Vg); % Material balance
124 for increments 2 to numInc
125     end
126 end
127 %OXIDATION HALF CYCLE
128
129 function dydt=ox_ode(t,v) %v represents the concentration of H2O
130 pO2=(Kox)^2*(v./(y_total-v)).^2;
131 dddp=(dmax*Kgrad.*exp(Kgrad*(log10(pO2)-Midpoint)))/(pO2*log(10).*(exp(Kgrad*(log10(pO2)-
132 Midpoint))+1).^2); %Derivative of logistic function
133 dpdy=(-2*(Kox)^2*y_total*v)/((v-y_total).^3); % Finding dpO2/dyH2O
134
135 % Setting up continuity equations
136 dydt=zeros(numInc,1);
137 dydt(numInc)=flowrate_ox.*(v(numInc)-y_H2O_inlet)/(dpdy(numInc).*dddp(numInc).*ms-Vg); %
138 Material balance for increment numInc
139 for j=1:numInc-1
140     k=numInc-j;
141     dydt(k)=flowrate_ox.*(v(k)-v(k+1))/(dpdy(k).*dddp(k).*ms-Vg); % Material balance for
142 increments numInc-1 to 1
143 end
144 end
145

```

146 Saving the simulation data

```

147 pox=(Kox)^2*(pH2O./(y_total-pH2O)).^2;
148 lpox=log10(pox);
149
150 pred=(1/Kred)^2*(y_total-pCO)./pCO).^2;
151 lpred=log10(pred);
152
153 delta_ox=dmax./(1+exp(-Kgrad*(lpox-Midpoint)));
154 delta_red=dmax./(1+exp(-Kgrad*(lpred-Midpoint)));
155
156 fname=sprintf('CLWGS_Ideal_%d_cycles_%d_secs_%.0f_K.mat',Number_of_cycles,Trun,T);
157 save(fname,'pCO','pH2O','delta_ox','delta_red');
158 end

```

159

## 160 Matlab code to visualise output data from CLWGS reactor model

161 "DataView.m" can be used to quickly plot the data output from ReactorModel.m as concentration  
162 profiles and conversions per cycle. To use, load in the data output from ReactorModel.m and enter  
163 values for 'bedlength', 'Res' and 'cycles'. Also set the value of 'durationofsinglecycles' according to the  
164 feed duration that was used in the simulation.

165 "DataView.m"  
166 Initialise code and load data

```

167 %%Script to quickly process model data
168 %
169 %Load data ouput from model
170

```

```

171 load CLWGS_Ideal_25_cycles_60_secs_1093_K.mat % Placeholder only. Enter the name of your own
172 .mat file here.
173 %Values to input
174
175 bedlength=100; % Enter the number of individual increments that were used in simulation
176 Res=6000; % Enter resolution of time dimension used in simulation
177 cycles=25; % Enter the number of cycles used in simulation
178
179 durationofsinglecycle=(Res/60)*4; % Use (Res/60)*20 when using 5 min feed durations
180 % Use (Res/60)*16 when using 4 min feed durations
181 % Use (Res/60)*12 when using 3 min feed durations
182 % Use (Res/60)*8 when using 2 min feed durations
183 % Use (Res/60)*4 when using 1 min feed durations
184

```

## 185 Preparing gas outlet data

```

186 pH2=0.05-pH2O; % Calculating concentration of H2. Concentration of H2 and H2O must sum to 0.05
187 in argon
188 pCO2=0.05-pCO; % Calculating concentration of CO2. Concentration of CO2 and CO must sum to
189 0.05 in argon
190 j=0; % Setting for argon hold duration
191 for i=1:cycles
192 H2((1+(j*Res)):(1+(j*Res))+(Res-1))=pH2(1,:,i);
193 H2O((1+(j*Res)):(1+(j*Res))+(Res-1))=pH2O(1,:,i);
194 CO2((1+(j*Res)):(1+(j*Res))+(Res-1))=0;
195 CO((1+(j*Res)):(1+(j*Res))+(Res-1))=0;
196 j=j+2; % How long the argon hold between half cycles is
197 H2((1+(j*Res)):(1+(j*Res))+(Res-1))=0;
198 H2O((1+(j*Res)):(1+(j*Res))+(Res-1))=0;
199 CO2((1+(j*Res)):(1+(j*Res))+(Res-1))=pCO2(bedlength,:,i);
200 CO((1+(j*Res)):(1+(j*Res))+(Res-1))=pCO(bedlength,:,i);
201 j=j+2; % How long the argon hold between half cycles is
202 end
203 clear j

```

204

## 205 Plot concentration profile

```

206 time=(1:(length(H2)))/60;
207 plot(time,H2,time,CO2,time,H2O,time,CO);
208 legend('H2','CO2','H2O','CO')
209 xlabel('Time (mins)') % x-axis label
210 ylabel('Conc.') % y-axis label

```

211

## 212 Preparing data for integration

```

213 time=(1:(length(H2)))/60;
214 ConcCO=[CO',ones(length(CO'),1)];
215 ConcCO2=[CO2',ones(length(CO2'),1)];
216 ConcH2=[H2',ones(length(H2'),1)];
217 ConcH2O=[H2O',ones(length(H2O'),1)];
218 time_trans=time';
219 totalhalfcycles=0; %at start

```

220

## 221 Integration loop (using trapz function)

```

222 for j=(cycles-10):cycles % Calculates conversions for specified range of cycles. Use a smaller
223 range for faster computation time.
224     realstarttime=(0)+(durationofsinglecycle*(j-1));

```

```

225     realendtime=(durationofsinglecycle-
226 (durationofsinglecycle/4))+(durationofsinglecycle*(j-1));
227     range_data=[realstarttime 0 ; realendtime 0];
228     range_index1 = knnsearch(time_trans,range_data(1,1));
229     range_index2 = knnsearch(time_trans,range_data(2,1));
230     totalrange=range_index2-range_index1+1;
231
232     COforintegrate=zeros(totalrange,1);
233     CO2forintegrate=zeros(totalrange,1);
234     H2forintegrate=zeros(totalrange,1);
235     H2Oforintegrate=zeros(totalrange,1);
236     timeforintegrate=zeros(totalrange,1);
237
238     for k=1:totalrange
239         H2Oforintegrate(k,1)=ConcH2O(k+range_index1-1,1);
240         H2forintegrate(k,1)=ConcH2(k+range_index1-1,1);
241         CO2forintegrate(k,1)=ConcCO2(k+range_index1-1,1);
242         COforintegrate(k,1)=ConcCO(k+range_index1-1,1);
243         timeforintegrate(k,1)=time_trans(k+range_index1-1,1);
244     end
245
246     IntegralCO(j+totalhalfcycles,1)=trapz(timeforintegrate,COforintegrate);
247     IntegralCO2(j+totalhalfcycles,1)=trapz(timeforintegrate,CO2forintegrate);
248     IntegralH2(j+totalhalfcycles,1)=trapz(timeforintegrate,H2forintegrate);
249     IntegralH2O(j+totalhalfcycles,1)=trapz(timeforintegrate,H2Oforintegrate);
250
251     clearvars totalrange timeforintegrate COforintegrate CO2forintegrate H2forintegrate
252     H2Oforintegrate
253 end

```

254

255 Plot conversions

```

256 H2conversion=IntegralH2./(IntegralH2+IntegralH2O);
257 CO2conversion=IntegralCO2./(IntegralCO2+IntegralCO);
258 nostp=length(IntegralH2); %number of cycles in plot
259 cycle(:,1) = linspace(1,nostp,nostp);
260
261 h0 = figure('units','normalized','outerposition',[0 0 1 1]);
262 plot(cycle, CO2conversion(:,1),'k-.',cycle,H2conversion(:,1),'k--');
263 legend('CO2','H2')
264 xlabel('Cycle Number') % x-axis label
265 ylabel('Conversion mol/mol') % y-axis label

```

266
